# Supplementary material for: Whole Proteome-Based Therapeutic Targets Annotation and Designing of Multi-Epitope-Based Vaccines against the Gram-Negative XDR-Alcaligenes faecalis Bacterium
Source: MDPI journal article supplement (doi:10.3390/vaccines10030462), 2022-03-17
Supplement: s1 [file s1]

**Table S1:** showing the antigenicity and allergenicity status for each of the shortlisted T cell epitope against target protein of (Accession ID:A0A3G6HK40) of *Alcaligenes faecalis*.

| Accession ID (Uniprot) | Epitope | Peptide sequences | Antigenicity Scores | Allergenicity Status |
|------------------------|---------|-------------------|---------------------|----------------------|
| A0A3G6HK40             | T cell  | ITDGWELAV         | 1.5                 | Allergen             |
| A0A3G6HK40             | T cell  | RTEQGQHLV         | 0.6                 | Allergen             |
| A0A3G6HK40             | T cell  | NTATITNQL         | 0.5                 | Allergen             |
| A0A3G6HK40             | T cell  | LTATGNSSL         | 0.7                 | Allergen             |

**Table S2:** MM-GBSA analysis showing individual binding energies for each of the docking complex.

| Docking Complex | Van der Waals energy (VDW) | Electro static energy (ELE) | Gibbs free energy (GB) | Surface Area (SA) | Total binding energy |
|-----------------|----------------------------|-----------------------------|------------------------|-------------------|----------------------|
| MEVC-A0A2U2BJQ9 | -118.67                    | -545.86                     | 647.66                 | -15.09            | -31.95               |
| MEVC-A0A3G6HQC3 | -119.17                    | -552.95                     | 650.35                 | -15.05            | -36.81               |
